# Supplementary material for: Small RNA sequencing reveals miR-642a-3p as a novel adipocyte-specific microRNA and miR-30 as a key regulator of human adipogenesis
Source: Springer Nature journal article supplement (doi:10.1186/gb-2011-12-7-r64), 2011-07-18

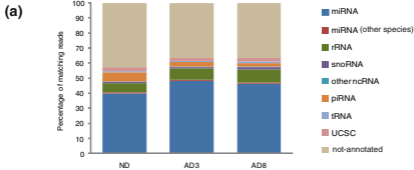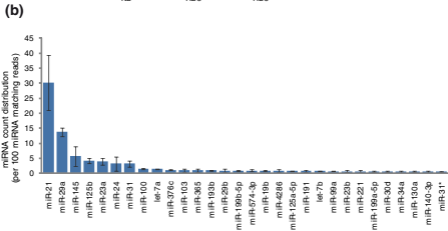

Supplement: 13059_2011_2566_MOESM12_ESM.pdf [file 13059_2011_2566_MOESM12_ESM.pdf]
