# Supplementary material for: Small RNA sequencing reveals miR-642a-3p as a novel adipocyte-specific microRNA and miR-30 as a key regulator of human adipogenesis
Source: Springer Nature journal article supplement (doi:10.1186/gb-2011-12-7-r64), 2011-07-18

hsa-mir-642a - chr 19 : 46178188 - 46178282 ( + )

counts (read len)

250  
200  
150  
100  
50  
0

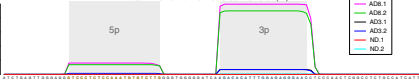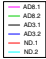

Supplement: 13059_2011_2566_MOESM14_ESM.pdf [file 13059_2011_2566_MOESM14_ESM.pdf]
