# Supplementary material for: Small RNA sequencing reveals miR-642a-3p as a novel adipocyte-specific microRNA and miR-30 as a key regulator of human adipogenesis
Source: Springer Nature journal article supplement (doi:10.1186/gb-2011-12-7-r64), 2011-07-18

**(a)**

miR-30 family inhibition - Adipogenesis D10

miR-30a and miR-30d overexpression - Adipogenesis D4

anti-neg

anti-miR-30

pre-miR-neg

pre-miR-30a

pre-miR-30d

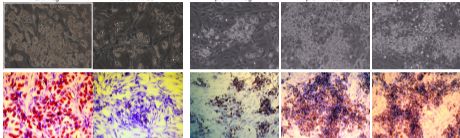**(b)**miR-30 family inhibition  
Adipogenesis D10miR-30a and -30d overexpression  
Adipogenesis D4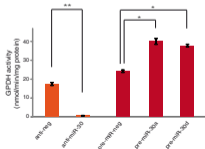**(c)**miR-30 family inhibition  
Adipogenesis D10miR-30a overexpression  
Adipogenesis D4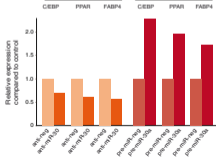

Supplement: 13059_2011_2566_MOESM15_ESM.pdf [file 13059_2011_2566_MOESM15_ESM.pdf]
